# Supplementary material
Source: PubMed Central journal article supplement (PMC3938541)

Supplementary Figure. **CHOP activation in N42 hypothalamic neurons exposed to elevated palmitate.** N42 hypothalamic neurons were incubated with or without elevated palmitate at the indicated concentrations for 24 hours, fixed, permeabilized and probed to visualize CHOP, actin, and the nucleus by immunofluorescence microscopy as described in “Materials and Methods”.

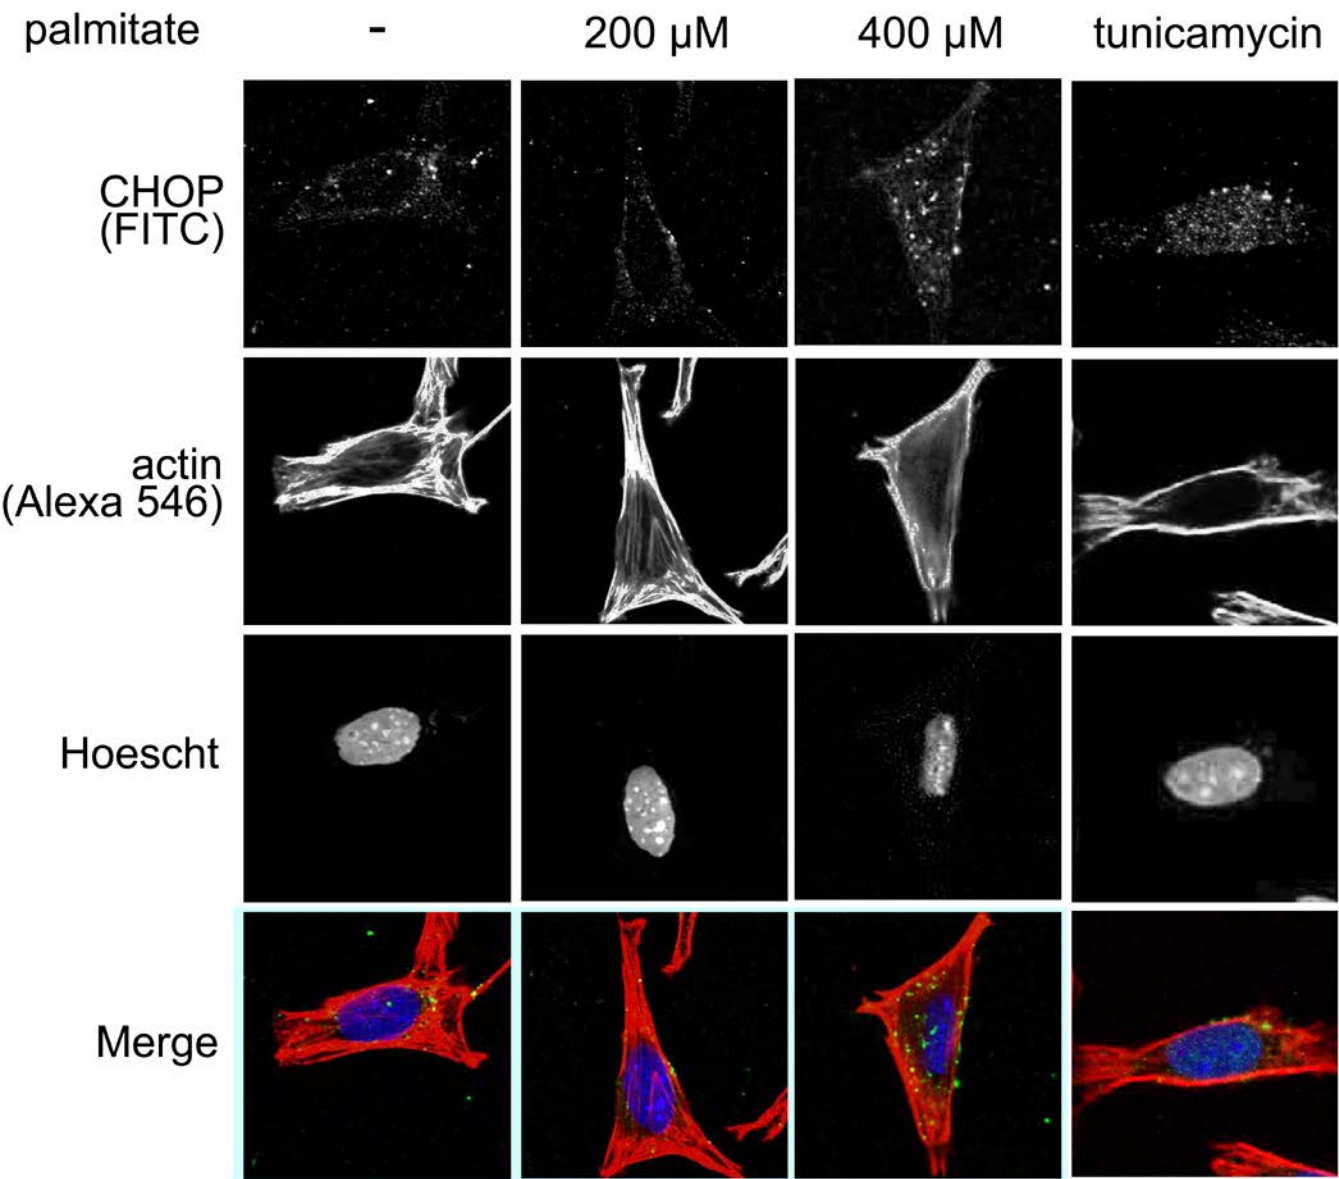

Supplement: me-13-1357.pdf [file me-13-1357.pdf]
